# Supplementary material for: Hybrid polyurethanes composed of isobutyl-substituted open-cage silsesquioxane in the main chains: synthesis, properties and surface segregation in a polymer matrix
Source: Royal Society of Chemistry journal article supplement (doi:10.1039/d1py00329a), 2021-01-01
Supplement: d1py00329a1.pdf [file d1py00329a1.pdf]

**Supporting information for**

**Hybrid polyurethanes composed of isobutyl-  
substituted open-cage silsesquioxane in the main  
chains: Synthesis, properties, and surface segregation  
in a polymer matrix**

*Yukiho Ueda, Hiroaki Imoto, Arifumi Okada, Huaizhong Xu, Hideki Yamane, Kensuke Naka*

(a)

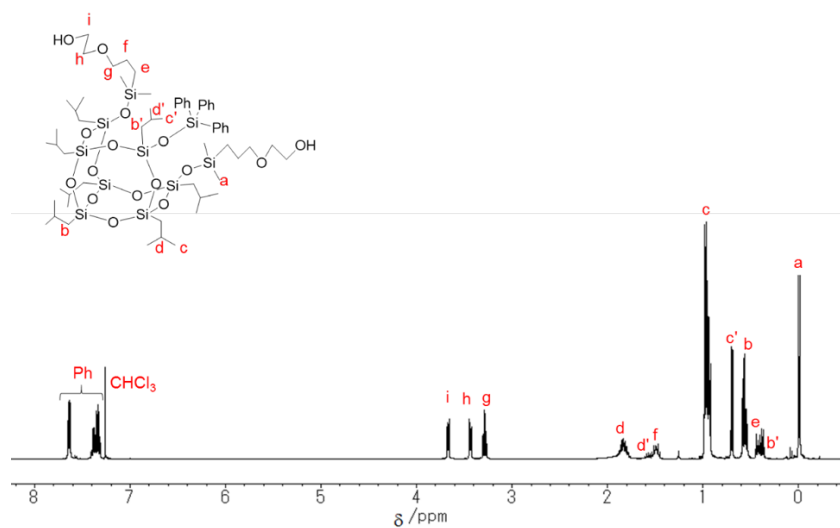

(b)

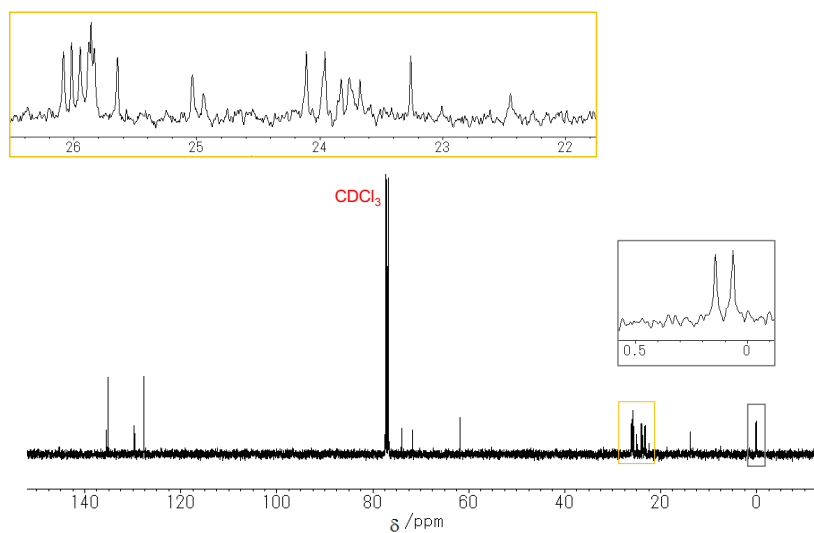

(c)

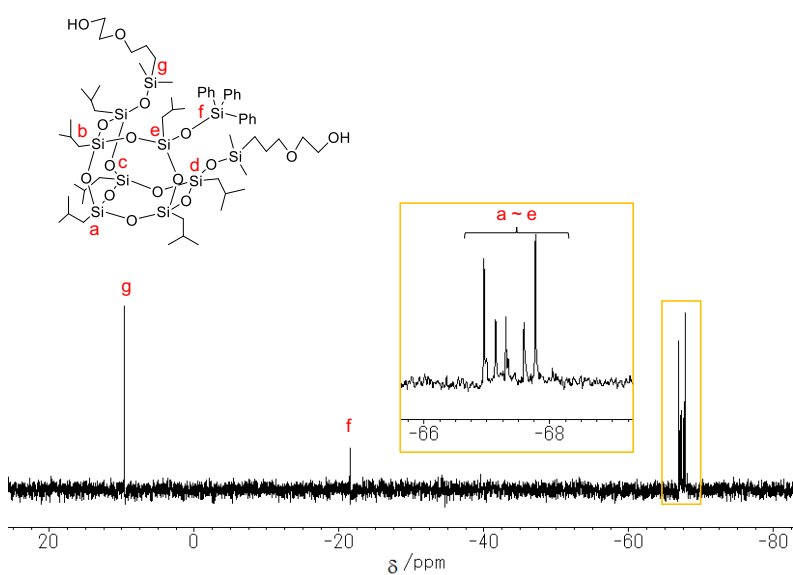

**Figure S1** (a) <sup>1</sup>H-, (b) <sup>13</sup>C-, and (c) <sup>29</sup>Si-NMR spectra of **2** in CDCl<sub>3</sub>.

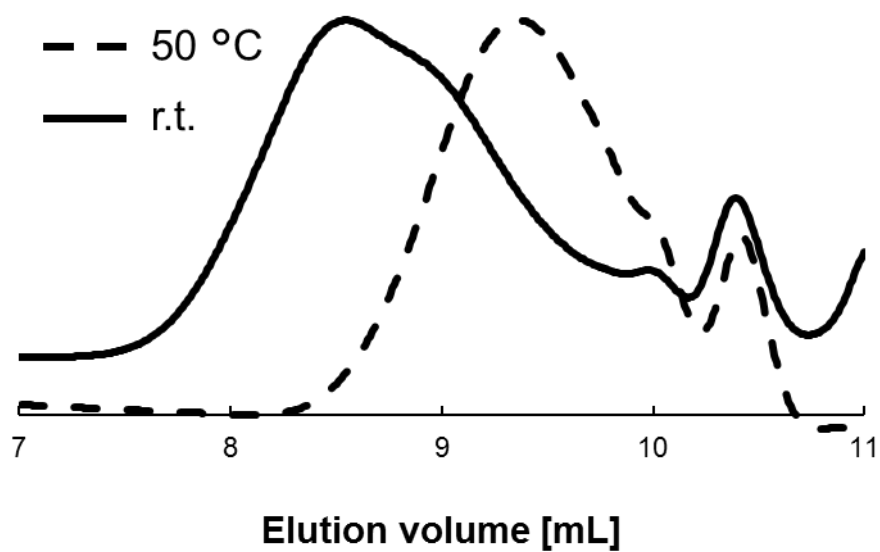

**Figure S2** SEC traces of crude **4b** polymerized at 50 °C and r.t.

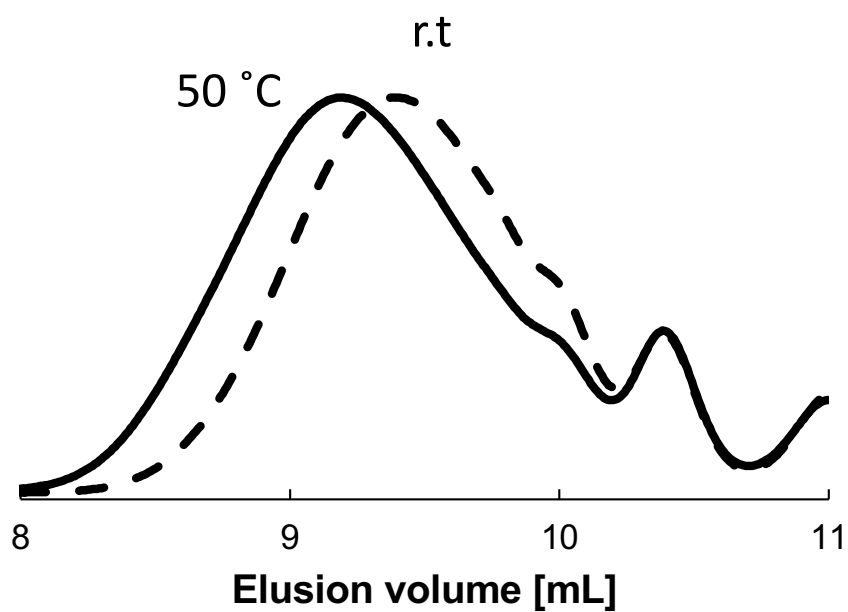

**Figure S3** SEC traces of crude **4a** polymerized at 50 °C and r.t.

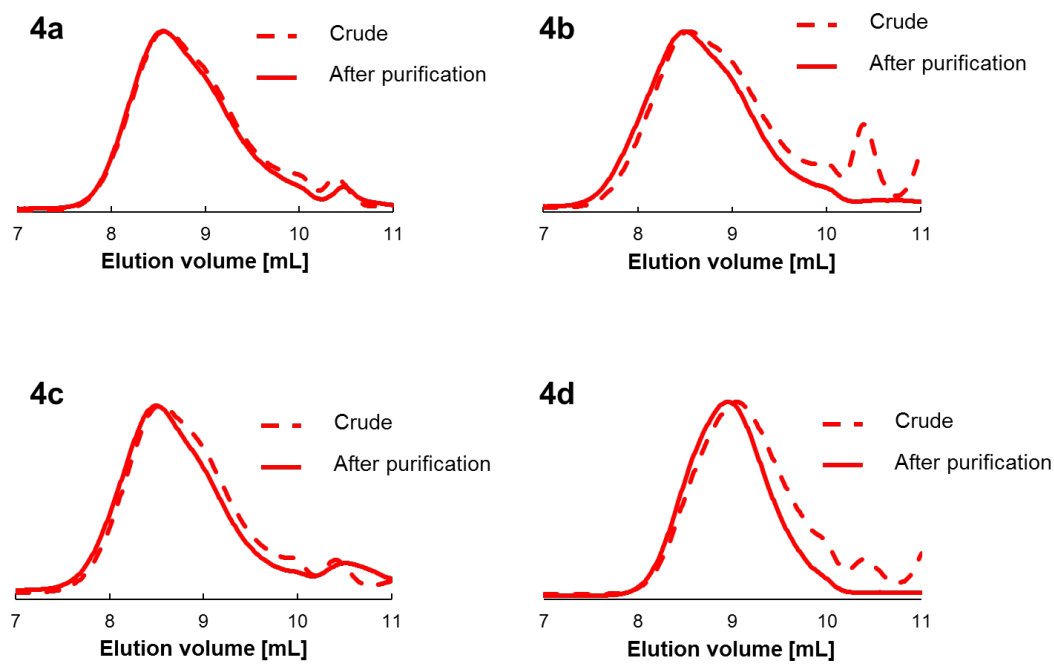

**Figure S4** SEC traces of **4a**, **4b**, **4c**, and **4d** before and after the purification.

(a)

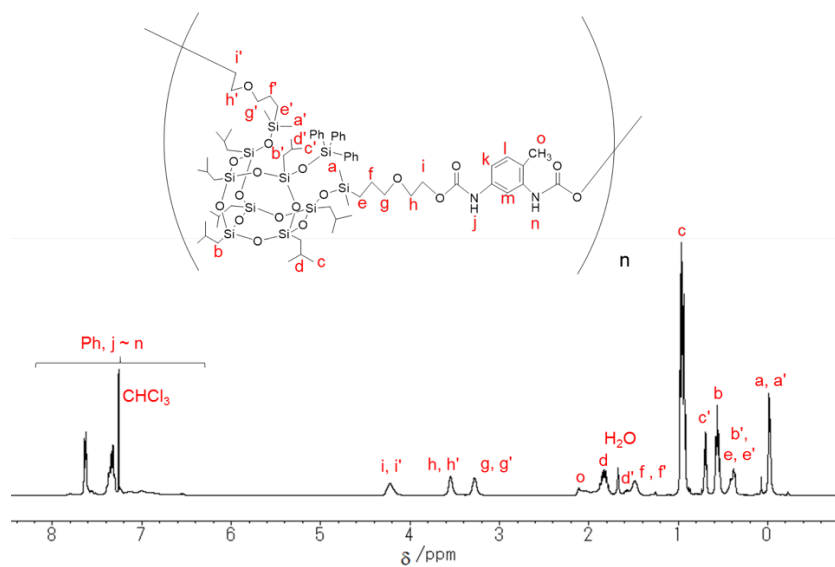

(b)

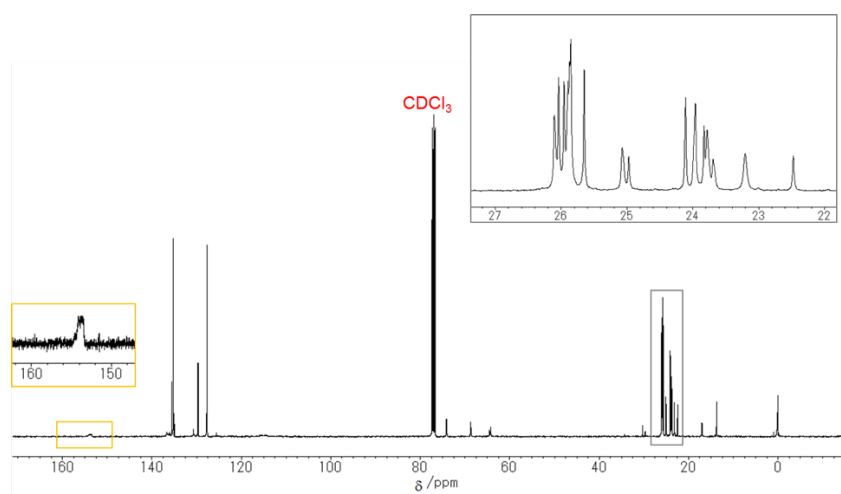

(c)

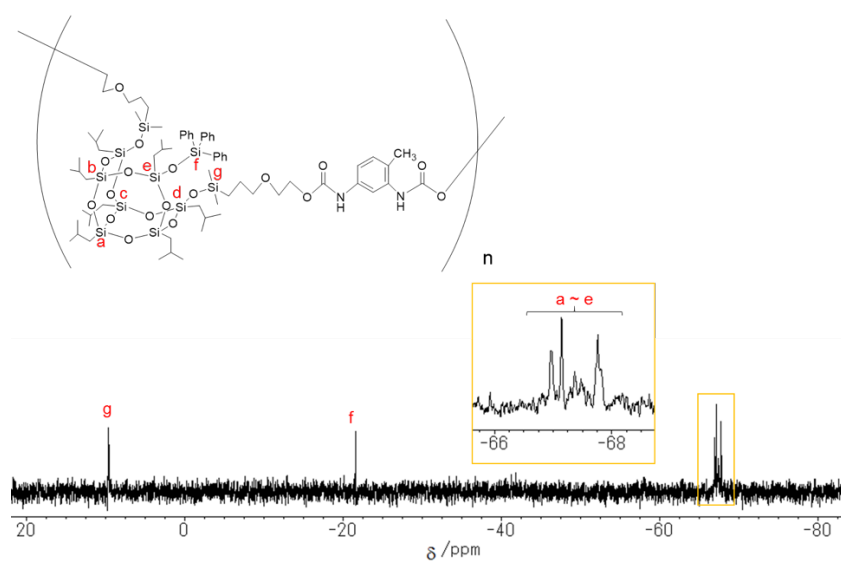

**Figure S5** (a) <sup>1</sup>H-, (b) <sup>13</sup>C-, and (c) <sup>29</sup>Si-NMR spectra of **4a** in CDCl<sub>3</sub>.

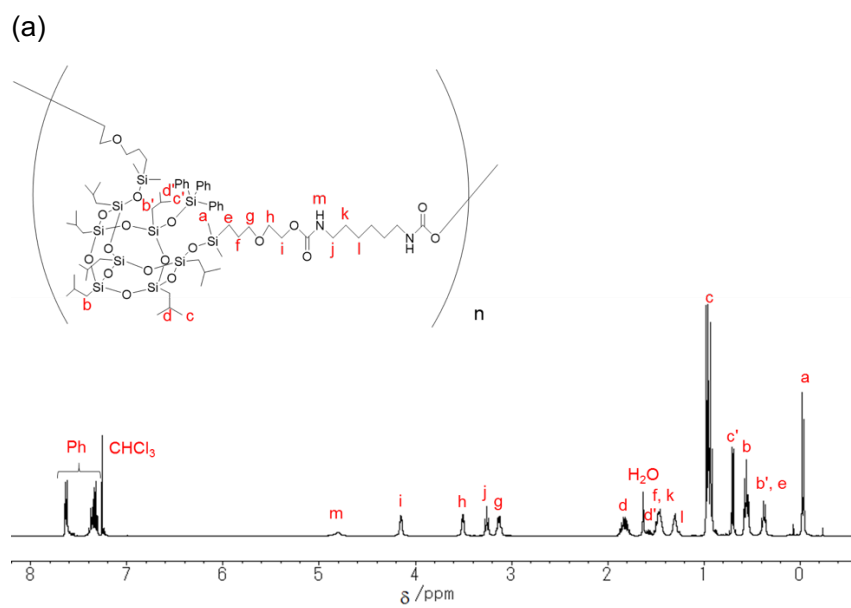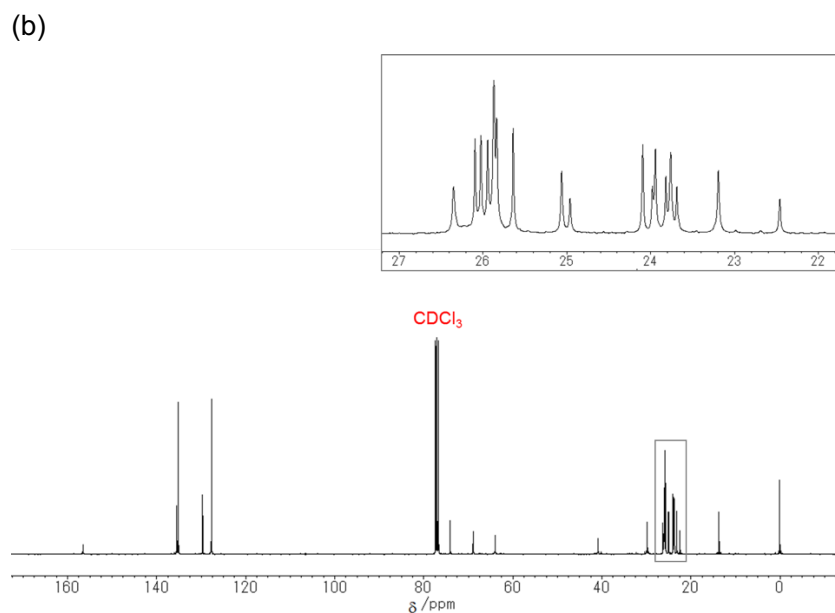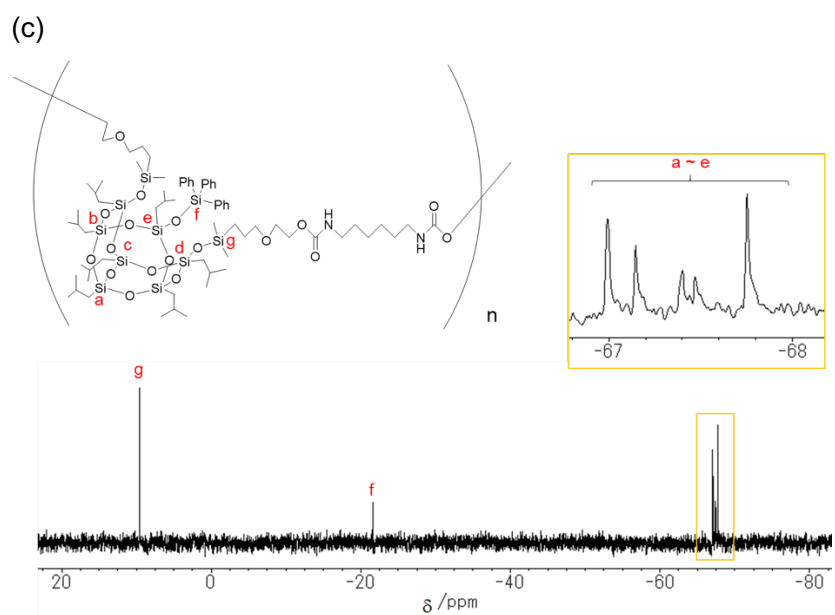

**Figure S6** (a)  $^1\text{H}$ -, (b)  $^{13}\text{C}$ -, and (c)  $^{29}\text{Si}$ -NMR spectra of **4b** in  $\text{CDCl}_3$ .

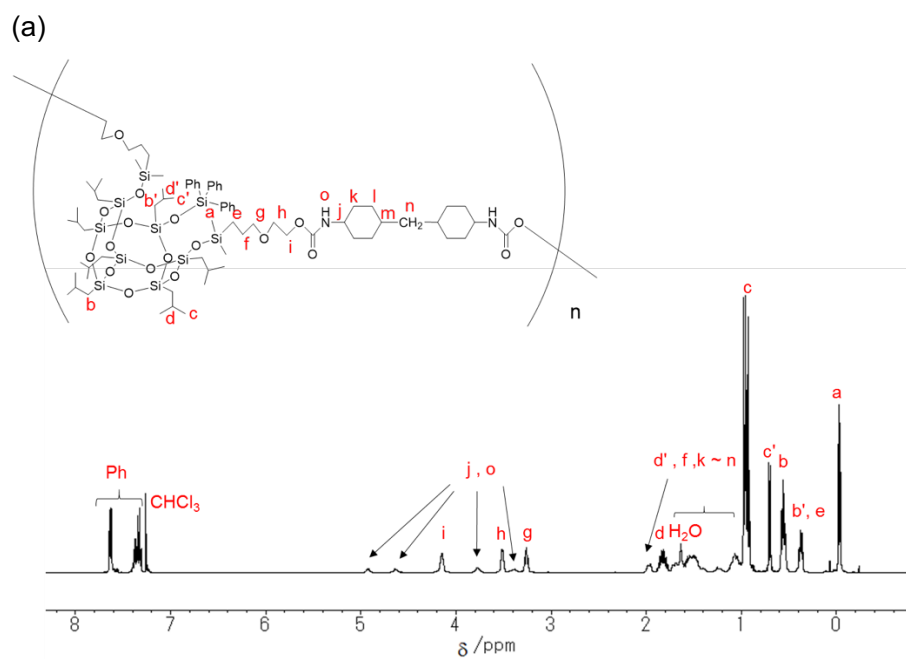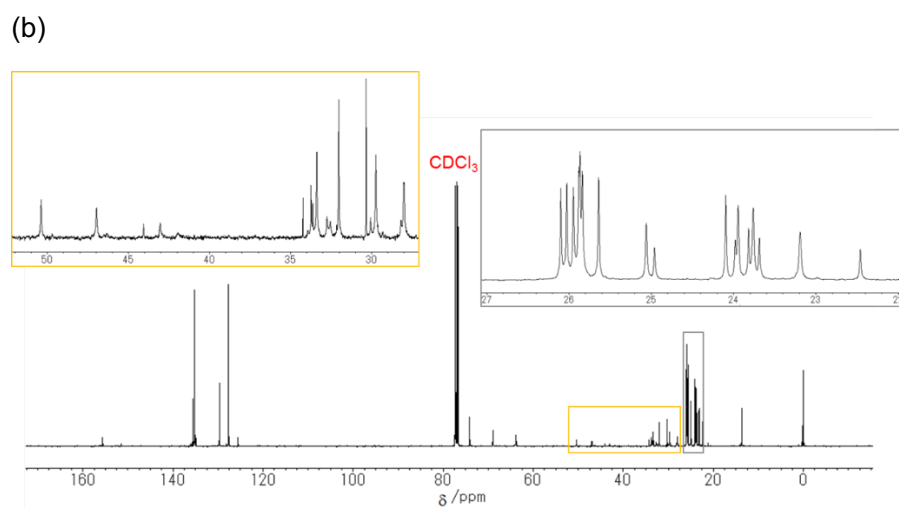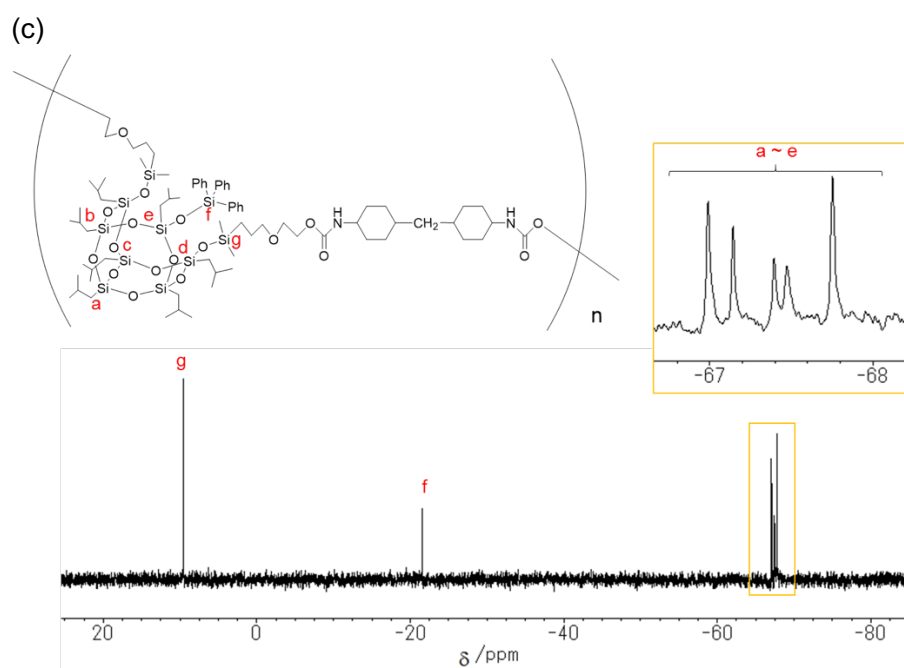

**Figure S7** (a) <sup>1</sup>H-, (b) <sup>13</sup>C-, and (c) <sup>29</sup>Si-NMR spectra of **4c** in CDCl<sub>3</sub>.

(a)

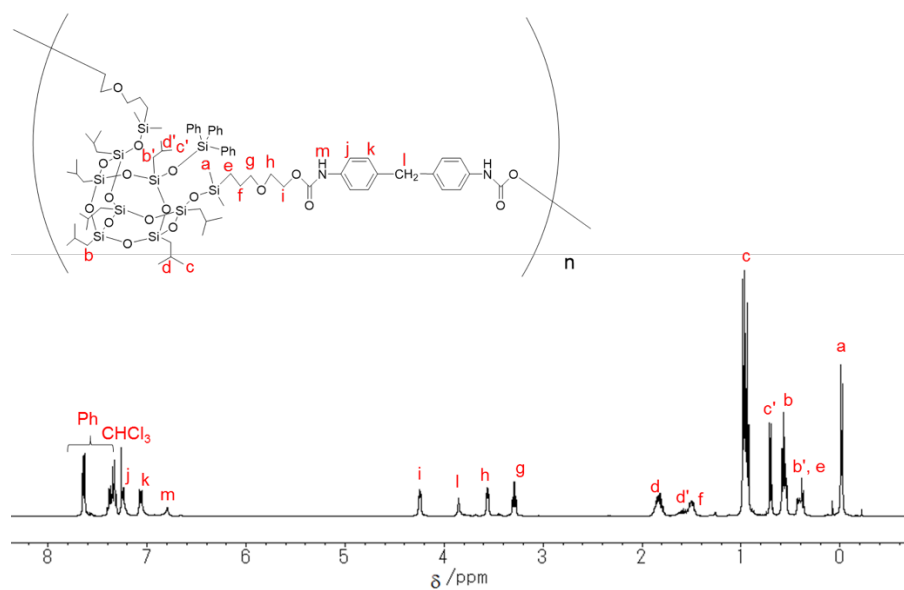

(b)

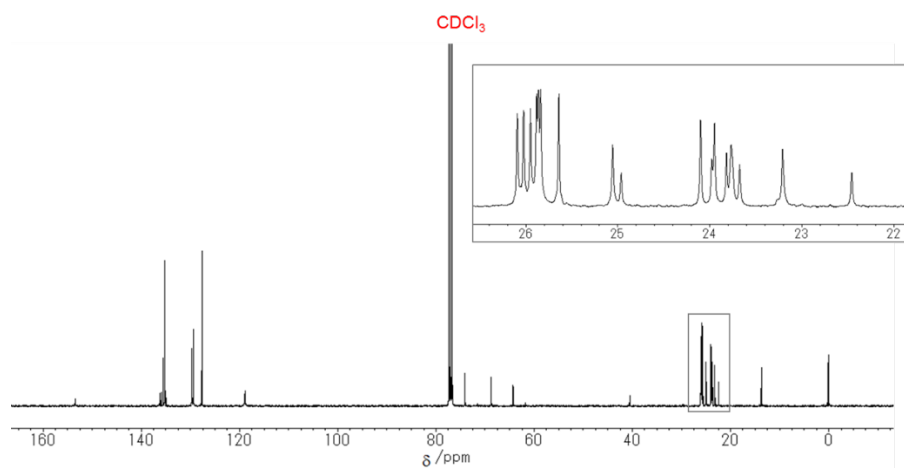

(c)

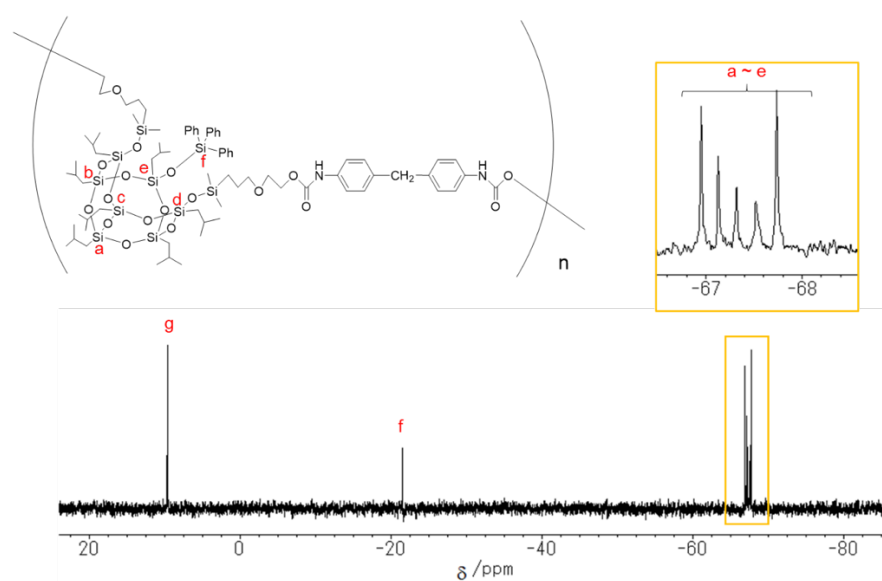

**Figure S8** (a)  $^1\text{H}$ -, (b)  $^{13}\text{C}$ -, and (c)  $^{29}\text{Si}$ -NMR spectra of **4d** in  $\text{CDCl}_3$ .

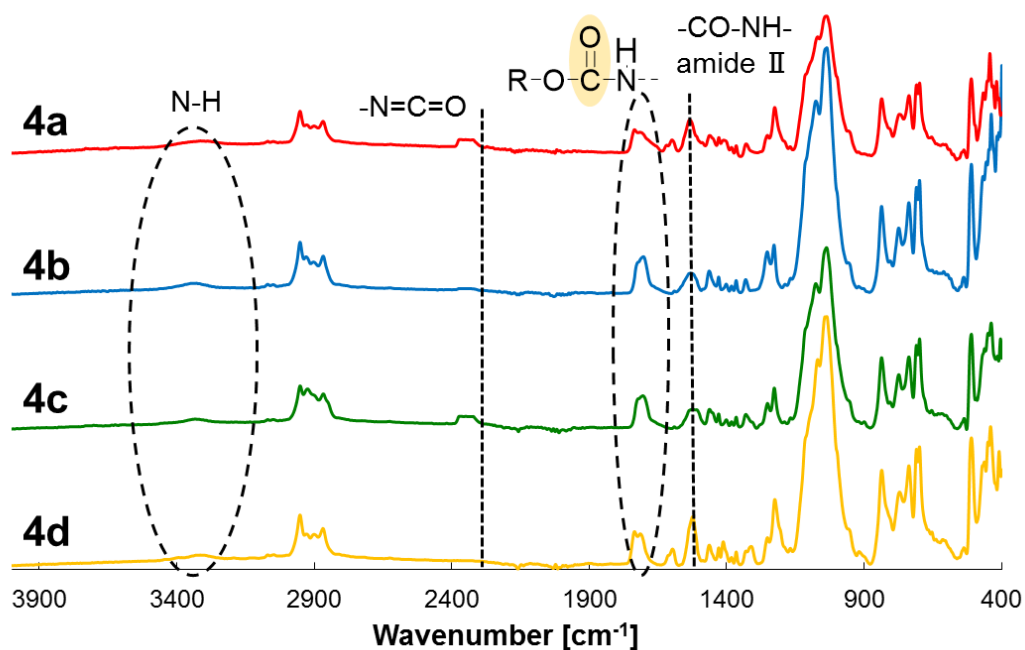

**Figure S9** FT-IR spectra of **4a**, **4b**, **4c**, and **4d**.

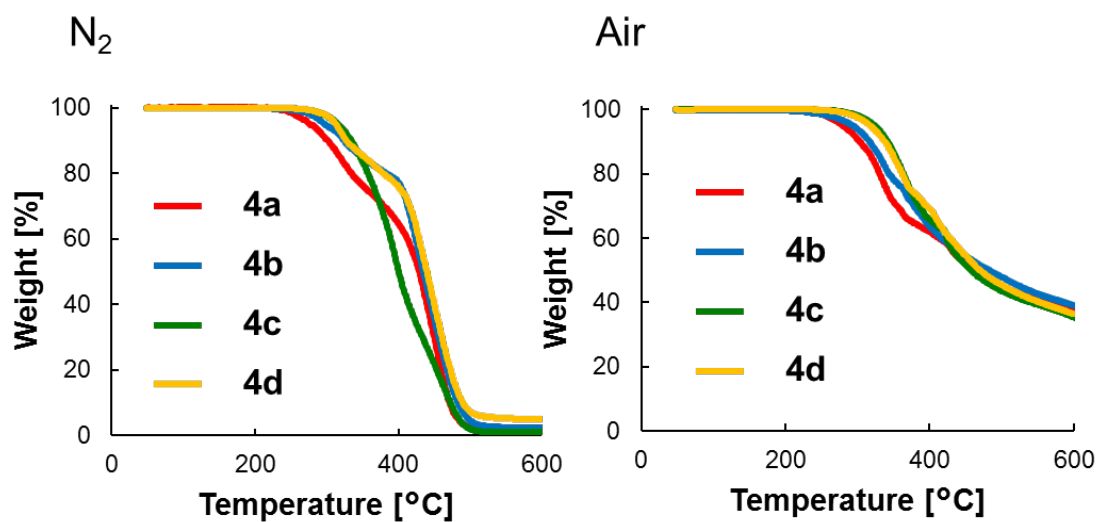

**Figure S10** TGA thermograms of the polymers under N<sub>2</sub> and air, 10 °C/min. No residue remained under N<sub>2</sub> due to sublimation, but high residual weights corresponding to SiO<sub>2</sub> were remained under air.

Table S1 Static water contact angles of the films of PMMA and PMMA containing **4**.

| Polymer   | Static water contact angles [°] |             |             |             |             |             |             |
|-----------|---------------------------------|-------------|-------------|-------------|-------------|-------------|-------------|
|           | 100 wt%                         | 0.5 wt%     | 1 wt%       | 2 wt%       | 5 wt%       | 10 wt%      | 20 wt%      |
| <b>4a</b> | 105.0 ± 1.0                     | 101.5 ± 1.0 | 101.8 ± 1.6 | 102.9 ± 1.7 | 102.0 ± 1.3 | 102.1 ± 1.3 | 102.8 ± 1.1 |
| <b>4b</b> | 121.4 ± 2.4                     | 105.3 ± 1.2 | 106.2 ± 0.8 | 106.2 ± 1.8 | 110.4 ± 1.2 | 110.9 ± 1.0 | 113.8 ± 2.1 |
| <b>4c</b> | 104.4 ± 1.7                     | 101.3 ± 0.8 | 101.6 ± 1.2 | 102.7 ± 1.2 | 101.6 ± 0.7 | 101.9 ± 1.6 | 102.4 ± 1.5 |
| <b>4d</b> | 106.1 ± 0.7                     | 102.0 ± 0.3 | 101.8 ± 1.2 | 103.2 ± 1.3 | 102.9 ± 0.5 | 101.3 ± 1.1 | 102.5 ± 0.7 |

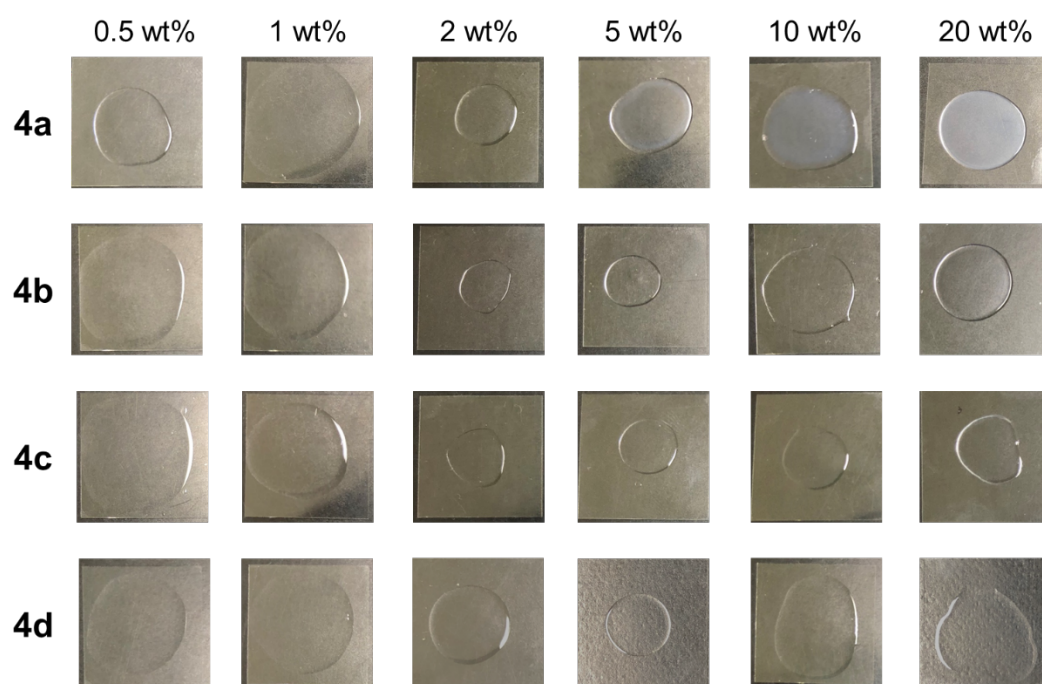

**Figure S11** Photographs of PMMA films containing 0.5, 1, 2, 5, 10, and 20 wt% **4**.

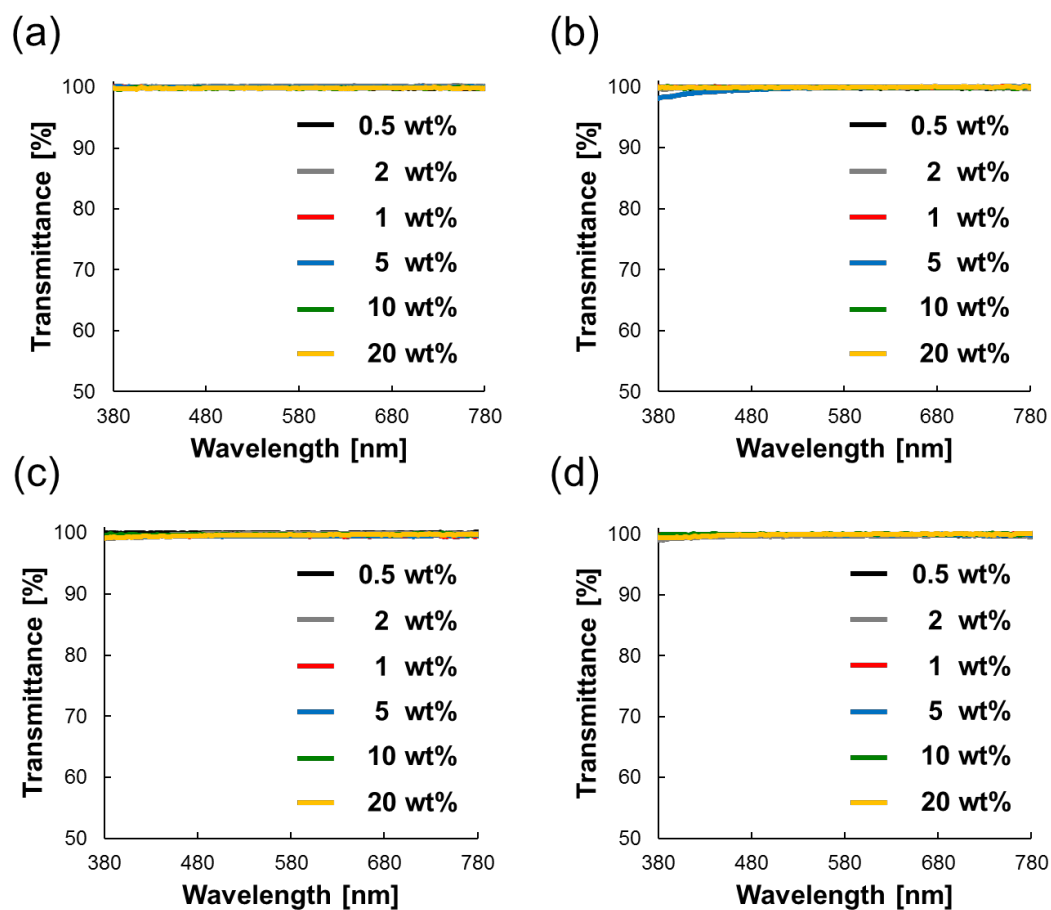

**Figure S12** Transmittance spectra of PMMA films containing 0.5, 1, 5, 10, and 20 wt% of (a) **4a**, (b) **4b**, (c) **4c**, and (d) **4d**.

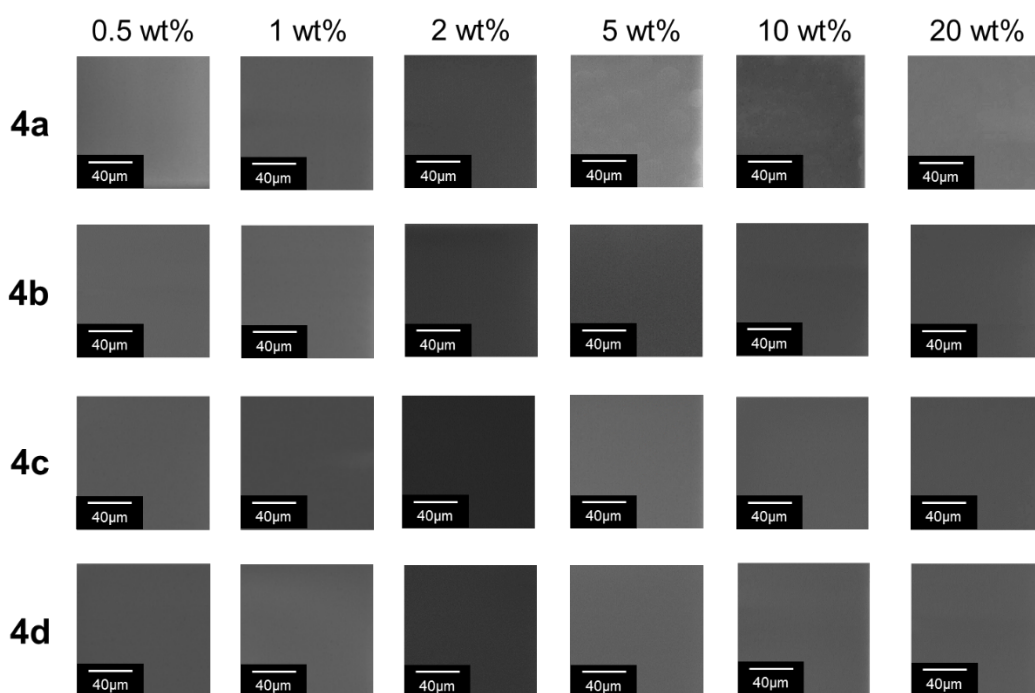

**Figure S13** SEM images of PMMA films containing 0.5, 1, 2, 5, 10, and 20 wt% **4**.

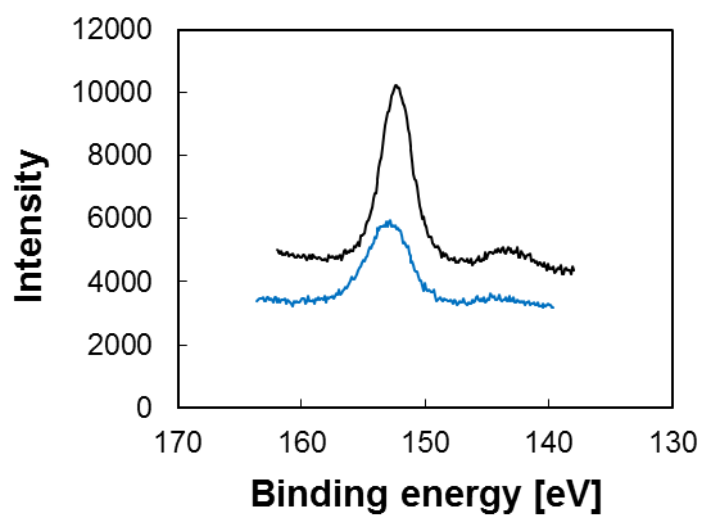

**Figure S14** Si 2p spectra of the PMMA film containing 5 wt% **4a** before and after the argon ion sputtering.

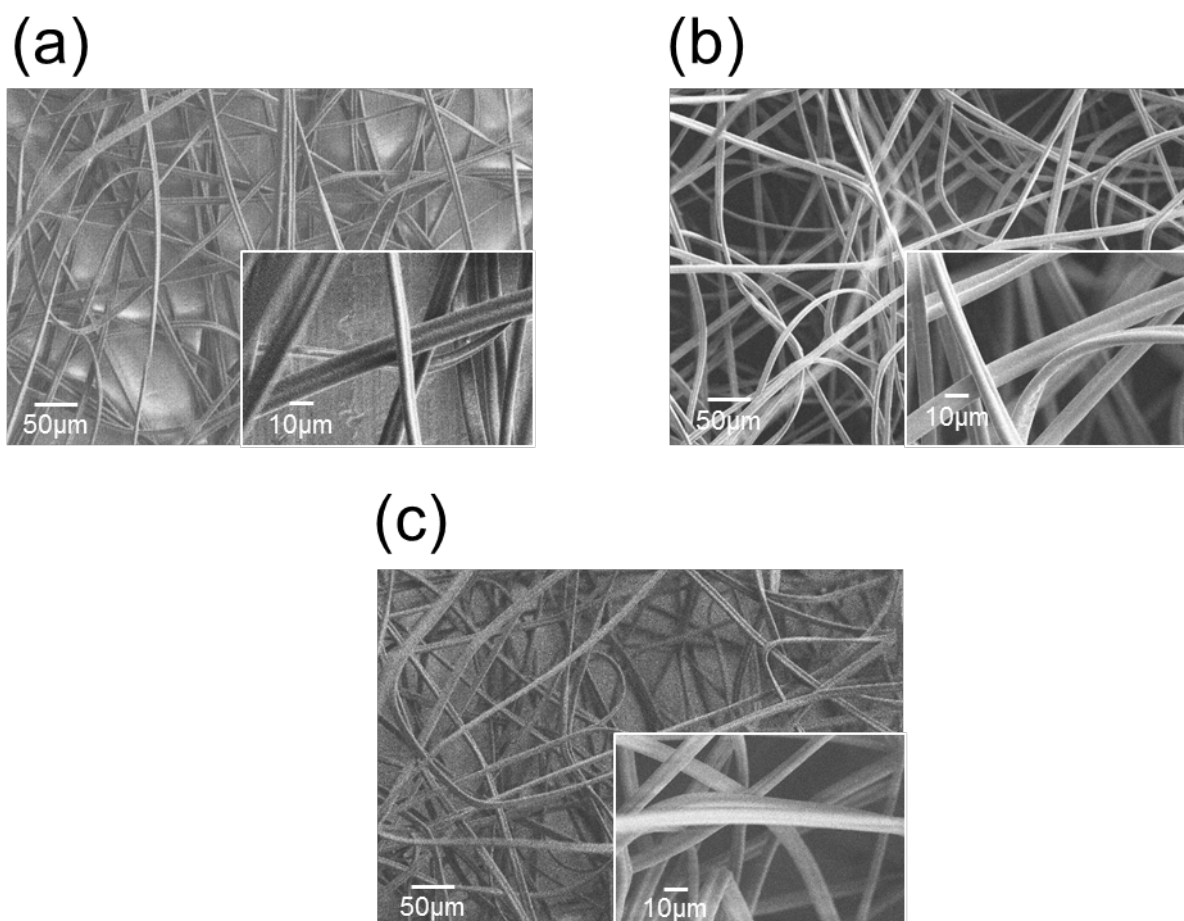

**Figure S15** SEM images of (a) PMMA nanofiber, (b) PMMA with 2 wt% **4a**, and (c) PMMA with 5 wt% **4a**.
